# Supplementary material for: Increased Importance of Aerosol-Cloud Interaction for Surface PM 2.5 Pollution Relative to Aerosol-Radiation Interaction in China With the Anthropogenic Emission Reduction
Source: Copernicus journal article supplement (doi:10.5194/egusphere-2023-502), 2023-05-11
Supplement: Supplementary file 1 [file egusphere-2023-502-supplement-version3.pdf]

# Supplementary Information

## Increased Importance of Aerosol-Cloud Interaction for Surface PM<sub>2.5</sub> Pollution Relative to Aerosol-Radiation Interaction in China with the Anthropogenic Emission Reduction

Da Gao<sup>1,2</sup>, Bin Zhao<sup>1,2,\*</sup>, Shuxiao Wang<sup>1,2</sup>, Yuan Wang<sup>3</sup>, Brian Gaudet<sup>4</sup>,  
Yun Zhu<sup>5</sup>, Xiaochun Wang<sup>1,2</sup>, Jiewen Shen<sup>1,2</sup>, Shengyue Li<sup>1,2</sup>, Yicong  
He<sup>1,2</sup>, Dejie Yin<sup>1,2</sup>, Zhaoxin Dong<sup>1,2</sup>

<sup>1</sup>State Key Joint Laboratory of Environment Simulation and Pollution  
Control, School of Environment, Tsinghua University, 100084 Beijing,  
China

<sup>2</sup>State Environmental Protection Key Laboratory of Sources and Control  
of Air Pollution Complex, Beijing, 100084, China

<sup>3</sup>Department of Earth, Atmospheric, and Planetary Sciences, Purdue  
University, West Lafayette, IN, USA,

<sup>4</sup>Pacific Northwest National Laboratory, Richland, Washington, USA

<sup>5</sup>Guangdong Provincial Key Laboratory of Atmospheric Environment and  
Pollution Control, College of Environment and Energy, South China  
University of Technology, Guangzhou Higher Education Mega Center,

23 Guangzhou, 510006, China

24 \*Correspondence to: Bin Zhao (bzhao@mail.tsinghua.edu.cn)

25

## 26 Section 1. The improvement for nitrate simulation

27 Before starting this work. We noted the poor ability of nitrate  
28 simulation in the WRF-Chem model. Previous studies reported that the  
29 nitrate underestimation might be attributed to the HONO underestimation  
30 (Wang et al., 2015; Xue et al., 2020). The source of HONO is originally  
31 from some gas-phase chemical reactions in the WRF-Chem, but other  
32 HONO sources are lacking, such as hydrolysis of  $\text{NO}_2$  on humid aerosol  
33 surfaces and heterogeneous conversion of  $\text{NO}_2$  on ground surfaces. It also  
34 has been confirmed that these reactions could occur in the atmosphere (Li  
35 et al., 2018, Liu et al., 2019). We added these four heterogeneous HONO  
36 reactions to the WRF-Chem model (Table S1). The addition of these four  
37 reactions enhances atmospheric oxidant and promotes OH radical  
38 formation, thereby promoting the formation of gaseous nitric acid through  
39 strong OH radicals reacting with  $\text{NO}_2$ . In addition, the reactions of  
40 hydrolysis of  $\text{NO}_2$  on humid aerosol surfaces contributed extra nitric acid.  
41 More nitric acid is beneficial for nitrate formation through condensation  
42 and heterogeneous reactions. Other specific information can be found in  
43 Zhang et al. (2021).

44

45 Table S1. Heterogeneous HONO reactions added in WRF-Chem (from

46 Zhang et al., 2021).

| number | Reaction                                                                          | Reference                             |
|--------|-----------------------------------------------------------------------------------|---------------------------------------|
| (1)    | $\text{NO}_2 + \text{aerosol} = 0.5 \times \text{HONO} + 0.5 \times \text{HNO}_3$ | Liu et al., (2019)                    |
| (2)    | $\text{NO}_2 + \text{aerosol} = 0.5 \times \text{HONO} + 0.5 \times \text{HNO}_3$ | Liu et al., (2019)                    |
| (3)    | $\text{NO}_2 + \text{ground} = \text{HONO}$                                       | Li et al., (2018), Liu et al., (2019) |
| (4)    | $\text{NO}_2 + \text{ground} + h\nu = \text{HONO}$                                | Liu et al., (2019)                    |

47

48 Table S2. Regional total emissions of gas and primary particulate matter in  
49 China in 2013 and 2021 and its decrease ratio from 2013 to 2021.

|                  | SO <sub>2</sub> | NO <sub>x</sub> | NH <sub>3</sub> | PM <sub>2.5</sub> | VOCs  |
|------------------|-----------------|-----------------|-----------------|-------------------|-------|
| 2013 (unit: kt)  | 22402           | 27753           | 11040           | 12536             | 25330 |
| 2021 (unit: kt)  | 5640            | 15096           | 8847            | 6445              | 22398 |
| (2013-2021)/2013 | 75%             | 46%             | 20%             | 49%               | 12%   |

50

51 Table S3. Statistics for the simulation of meteorological factors in January  
52 and July of 2013 and 2021.

| Meteorological factors |              | OBS    | SIM    | Bias  |
|------------------------|--------------|--------|--------|-------|
| T2 (°C)                | January 2013 | 269.23 | 269.10 | -0.76 |
|                        | January 2021 | 270.56 | 269.97 | -0.59 |
|                        | July 2013    | 298.02 | 297.16 | -0.86 |
|                        | July 2021    | 298.55 | 297.65 | -0.90 |
| Q2 (g/kg)              | January 2013 | 2.47   | 2.38   | -0.09 |
|                        | January 2021 | 2.54   | 2.46   | -0.09 |
|                        | July 2013    | 14.86  | 14.71  | -0.15 |
|                        | July 2021    | 16.30  | 15.58  | -0.72 |
| WS10 (m/s)             | January 2013 | 2.38   | 3.31   | 0.94  |
|                        | January 2021 | 2.68   | 3.68   | 1.00  |
|                        | July 2013    | 2.62   | 3.62   | 1.00  |
|                        | July 2021    | 2.69   | 3.51   | 0.82  |
| WD10 (°)               | January 2013 | 275.99 | 282.83 | 10.27 |
|                        | January 2021 | 259.21 | 251.70 | 11.46 |
|                        | July 2013    | 192.27 | 183.08 | 4.86  |
|                        | July 2021    | 180.47 | 157.43 | 3.96  |

53

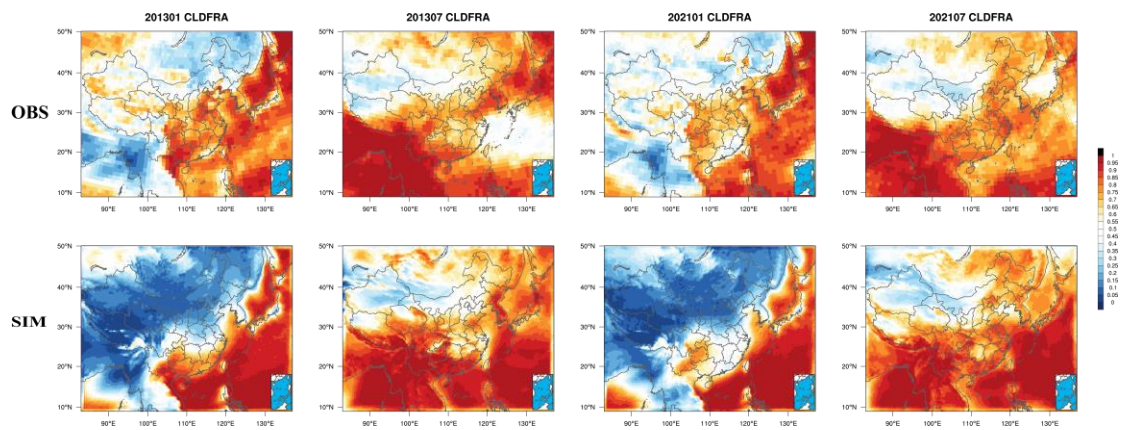

54

55 Fig. S1. Observation and simulation of cloud fraction in January and July  
56 of 2013 and 2021.

57

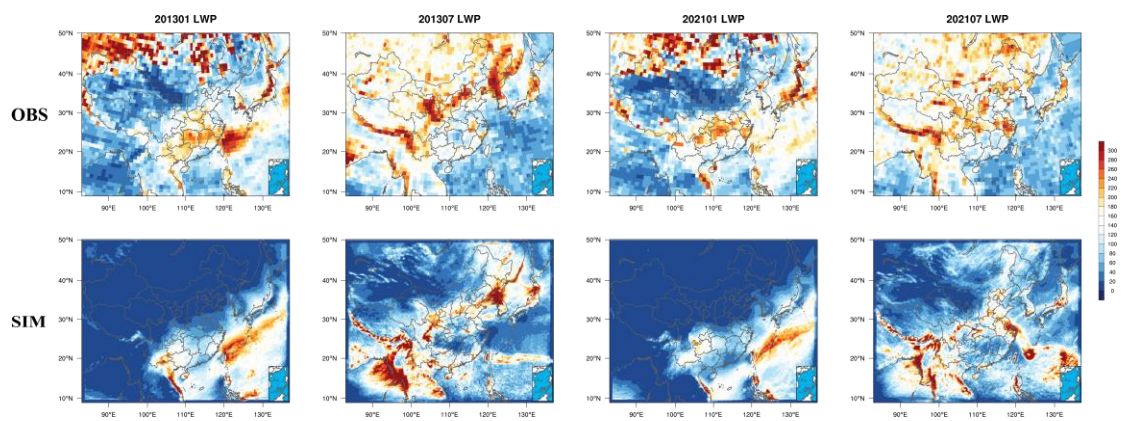

58

59 Fig. S2. Observation and simulation of liquid water path (unit:  $\text{g m}^{-2}$ ) in  
60 January and July of 2013 and 2021.

61

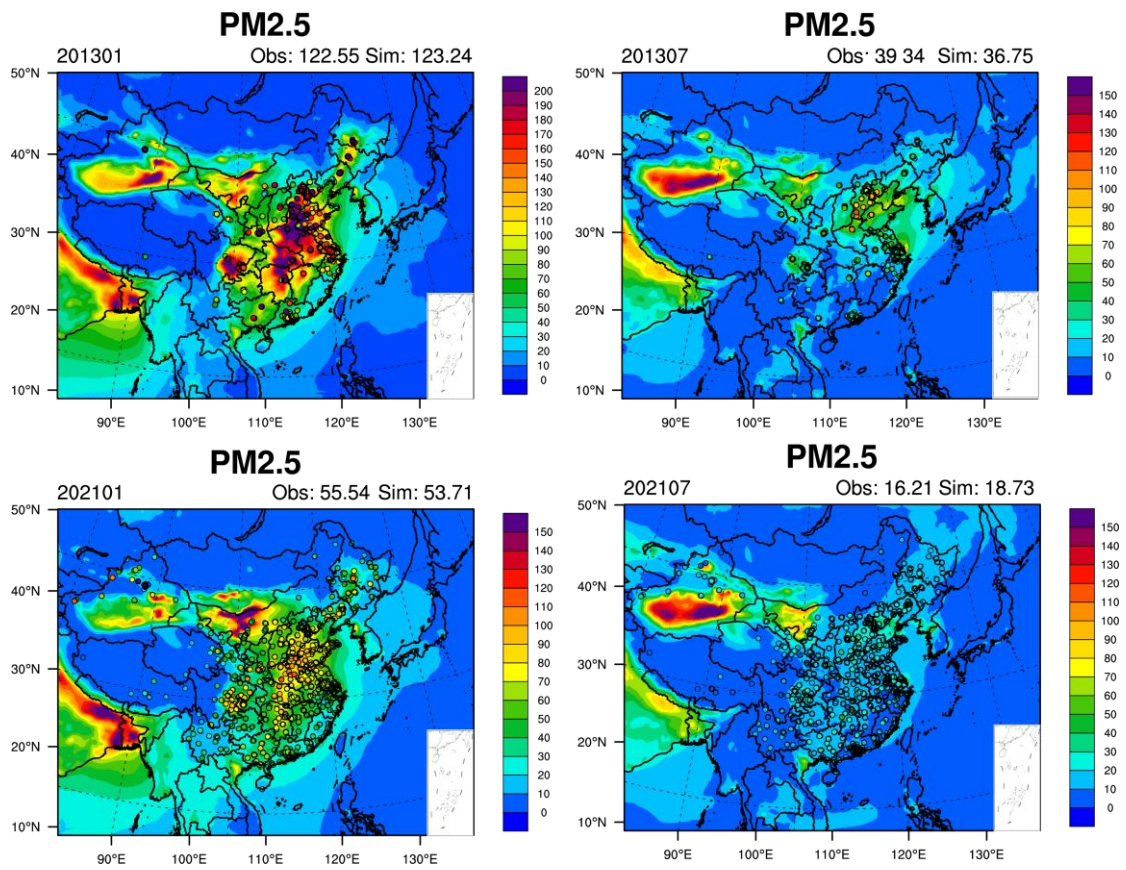

62

63 Fig. S3. Observation and simulation of surface PM<sub>2.5</sub> concentration (unit:

64  $\mu\text{g m}^{-3}$ ) in January and July of 2013 and 2021.

65

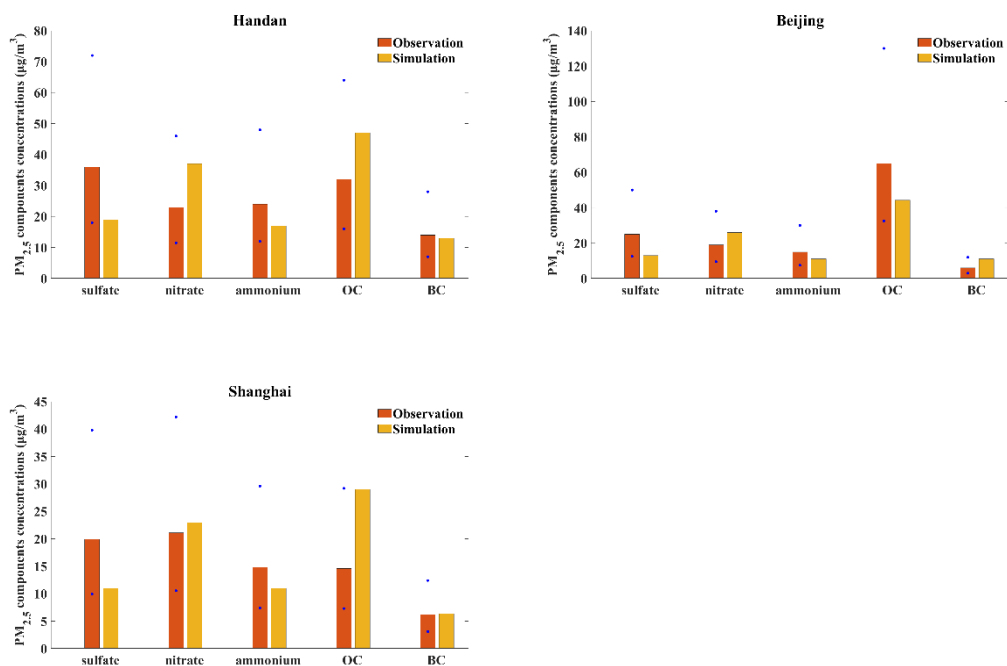

66

67

68 Fig. S4. Comparisons between PM<sub>2.5</sub> component observations and  
69 simulations in Handan, Beijing and Shanghai in January 2013. The blue  
70 points represent double or half of the PM<sub>2.5</sub> component observations. OC  
71 and BC represent organic aerosol and black carbon.

72

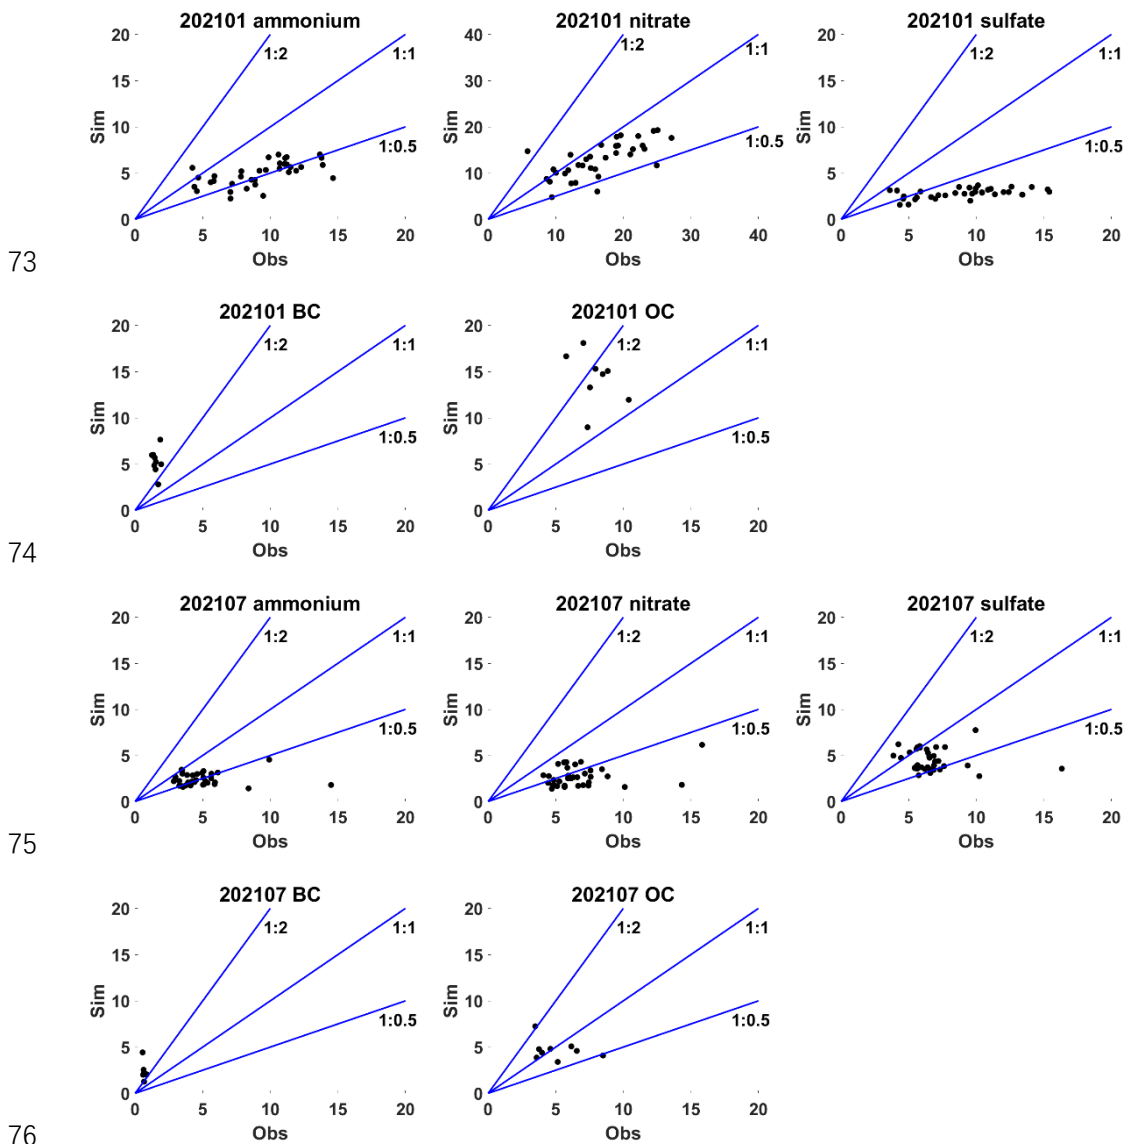

77 Fig. S5. The ratios of simulation to observation of ammonium, nitrate,  
78 sulfate, BC and OC (unit:  $\mu\text{g m}^{-3}$ ) in January and July 2021.

79

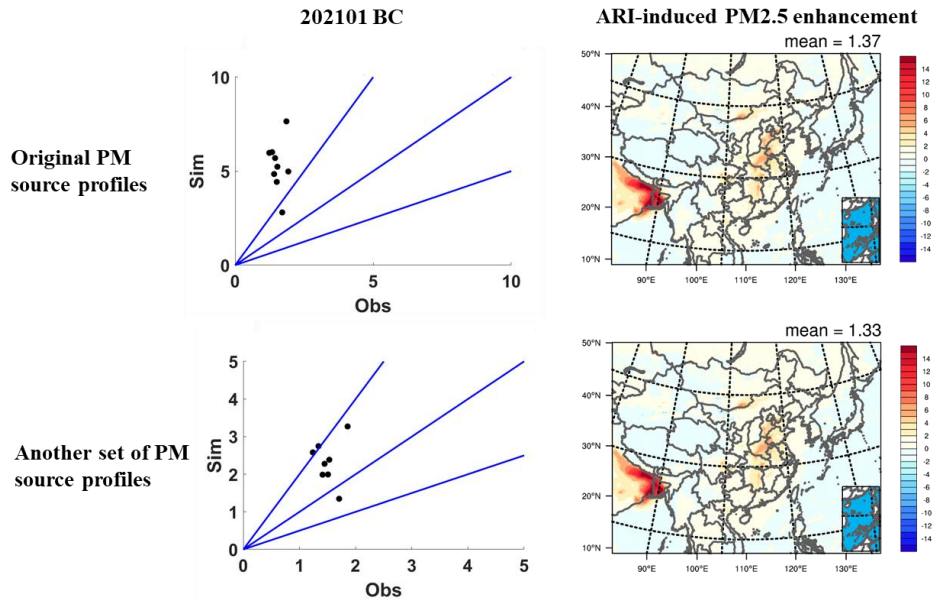

80

81 Fig. S6. The ratios of simulation to observation of BC and ARI-induced  
 82  $PM_{2.5}$  enhancement (unit:  $\mu g m^{-3}$ ) obtained from original PM source  
 83 profiles and another set of PM source profiles in January 2021.

84

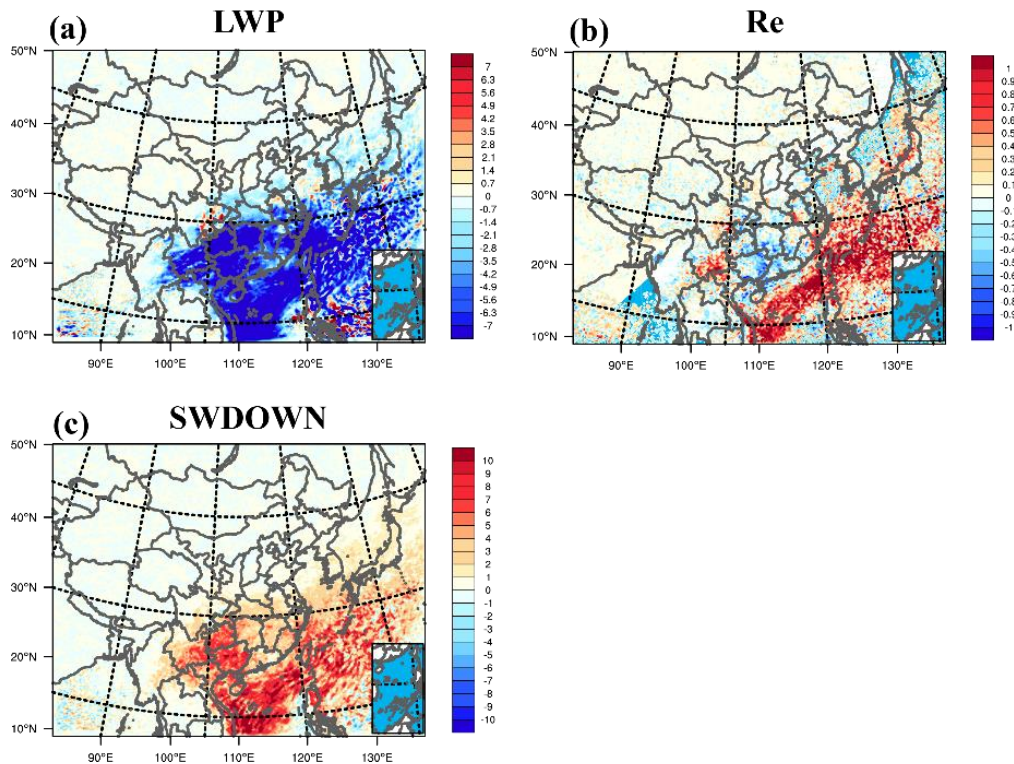

85

86 Fig. S7. Change in aerosol-induced liquid water path (LWP) (unit:  $g m^{-2}$ ),

87 Re (unit:  $\mu\text{m}$ ) and ACI-induced downward shortwave radiation at the  
88 surface (SWDOWN) reduction (unit:  $\text{W m}^{-2}$ ) in January owing to the  
89 emission reduction from 2013 to 2021.

90

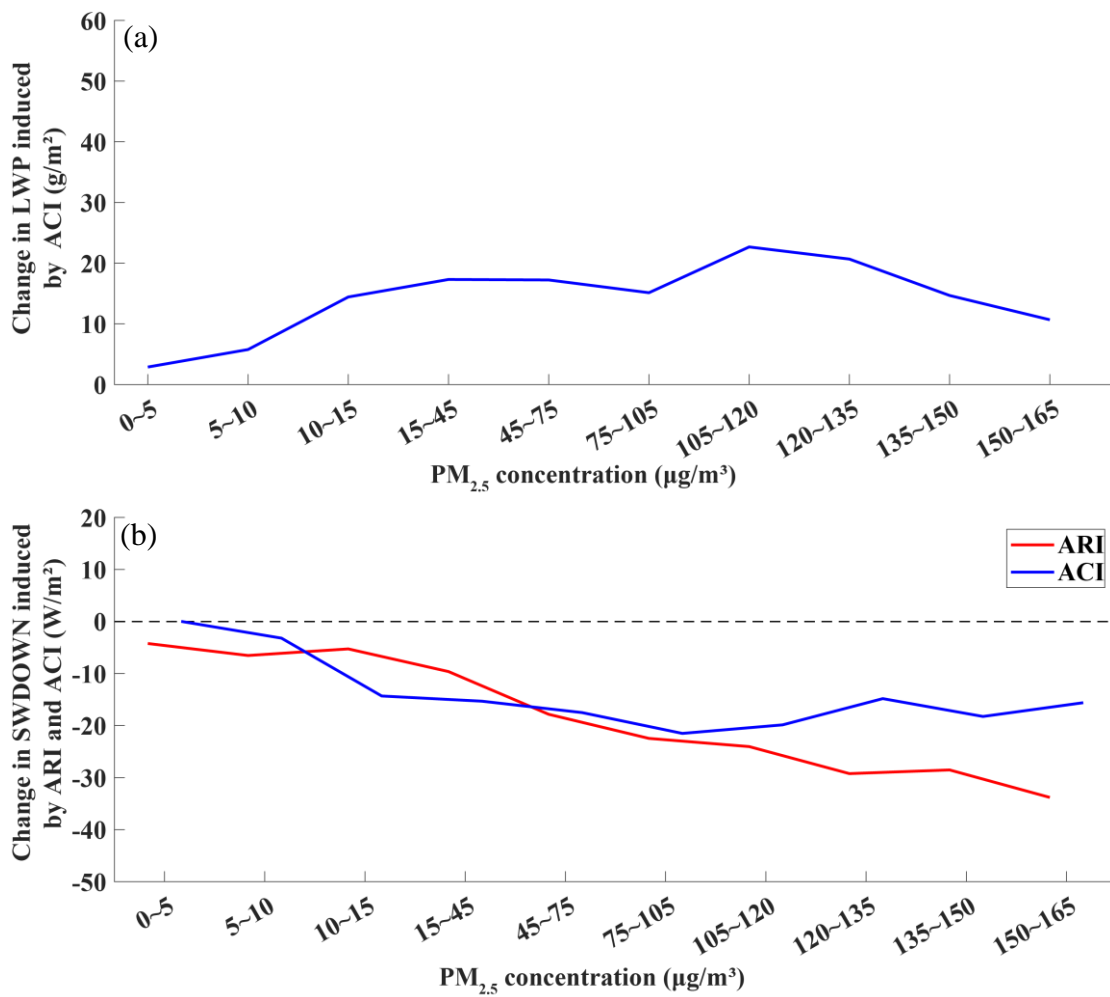

91

92

93 Fig. S8. Change in LWP induced by ACI and SWDOWN induced by ARI  
94 and ACI at different  $\text{PM}_{2.5}$  levels.

95



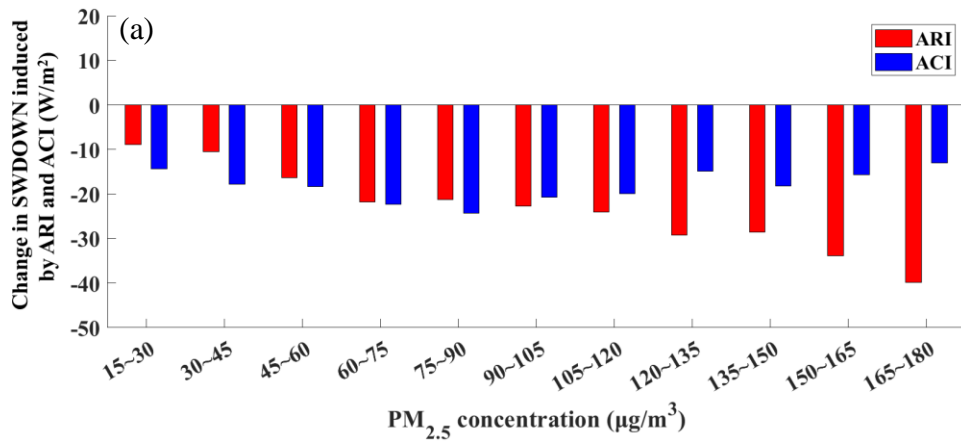

96

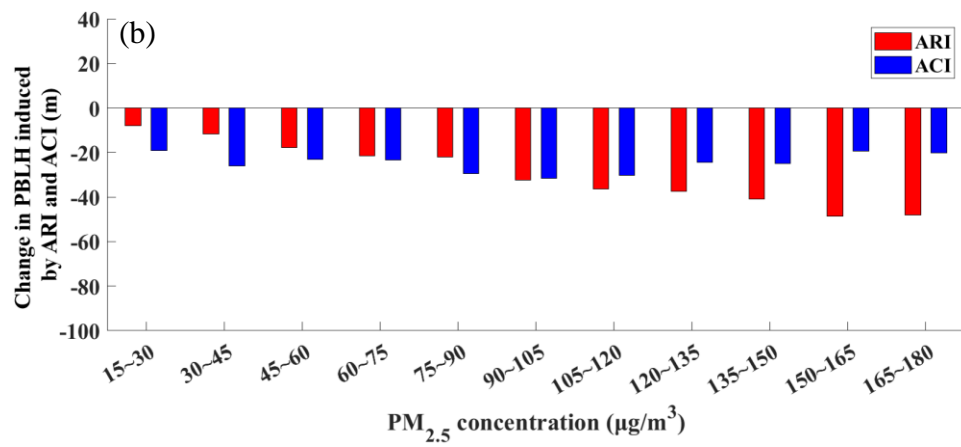

97

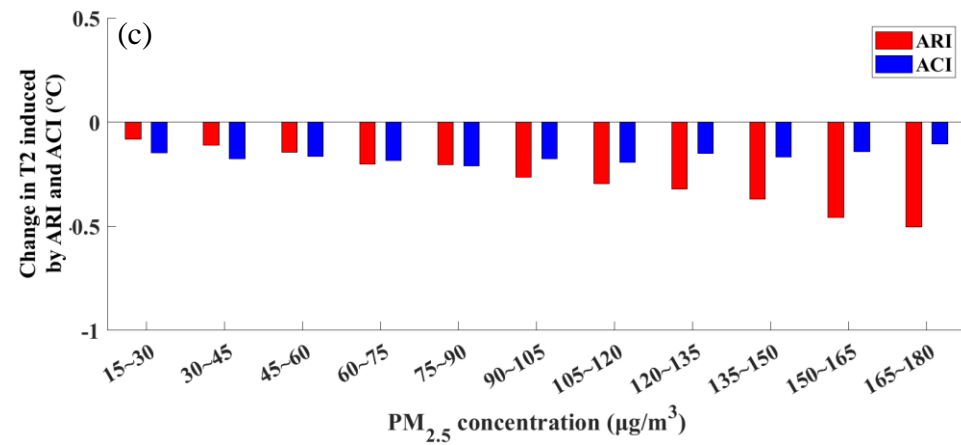

98

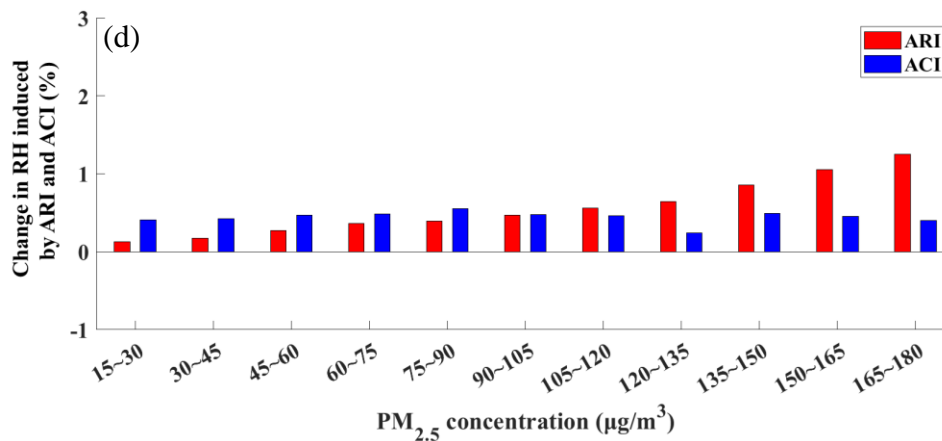

99

100 Fig. S9. Change in (a) SWDOWN, (b) planetary boundary layer height  
 101 (PBLH), (c) air temperature at 2 m (T2), and (d) relative humidity (RH)  
 102 induced by ARI and ACI at different ambient PM<sub>2.5</sub> levels. These data are  
 103 from the simulations for January and July in the experiments of 21M13E  
 104 and 21M21E.

105

106 References

107 Li, D. D., Xue, L. K., Wen, L., Wang, X. F., Chen, T. S., Mellouki, A., Chen,  
 108 J. M., and Wang, W. X.: Characteristics and sources of nitrous acid in  
 109 an urban atmosphere of northern China: Results from 1-yr continuous  
 110 observations, Atmos Environ, 182, 296-306,  
 111 10.1016/j.atmosenv.2018.03.033, 2018.

112 Liu, Y. H., Lu, K. D., Li, X., Dong, H. B., Tan, Z. F., Wang, H. C., Zou, Q.,  
 113 Wu, Y. S., Zeng, L. M., Hu, M., Min, K. E., Kecorius, S.,  
 114 Wiedensohler, A., and Zhang, Y. H.: A Comprehensive Model Test of  
 115 the HONO Sources Constrained to Field Measurements at Rural

116 North China Plain, *Environ Sci Technol*, 53, 3517-3525,  
117 10.1021/acs.est.8b06367, 2019.

118 Wang, L. W., Wen, L., Xu, C. H., Chen, J. M., Wang, X. F., Yang, L. X.,  
119 Wang, W. X., Yang, X., Sui, X., Yao, L., and Zhang, Q. Z.: HONO and  
120 its potential source particulate nitrite at an urban site in North China  
121 during the cold season, *Sci Total Environ*, 538, 93-101,  
122 10.1016/j.scitotenv.2015.08.032, 2015.

123 Xue, C. Y., Zhang, C. L., Ye, C., Liu, P. F., Catoire, V., Krysztofiak, G.,  
124 Chen, H., Ren, Y. G., Zhao, X. X., Wang, J. H., Zhang, F., Zhang, C.  
125 X., Zhang, J. W., An, J. L., Wang, T., Chen, J. M., Kleffmann, J.,  
126 Mellouki, A., and Mu, Y. J.: HONO Budget and Its Role in Nitrate  
127 Formation in the Rural North China Plain, *Environ Sci Technol*, 54,  
128 11048-11057, 10.1021/acs.est.0c01832, 2020.

129 Zhang, S. P., Sarwar, G., Xing, J., Chu, B. W., Xue, C. Y., Sarav, A., Ding,  
130 D. A., Zheng, H. T., Mu, Y. J., Duan, F. K., Ma, T., and He, H.:  
131 Improving the representation of HONO chemistry in CMAQ and  
132 examining its impact on haze over China, *Atmos Chem Phys*, 21,  
133 15809-15826, 10.5194/acp-21-15809-2021, 2021.

134
