# Supplementary material for: Increased Importance of Aerosol-Cloud Interaction for Surface PM 2.5 Pollution Relative to Aerosol-Radiation Interaction in China With the Anthropogenic Emission Reduction
Source: Copernicus journal article supplement (doi:10.5194/egusphere-2023-502), 2023-05-11
Supplement: Supplementary file 2 [file egusphere-2023-502-supplement.pdf]

## Supplementary Information

### **Increased Importance of Aerosol-Cloud Interaction for Surface PM<sub>2.5</sub> Pollution Relative to Aerosol-Radiation Interaction in China With the Anthropogenic Emission Reduction**

Da Gao<sup>1,2</sup>, Bin Zhao<sup>1,2,\*</sup>, Shuxiao Wang<sup>1,2</sup>, Yuan Wang<sup>3</sup>, Brian Gaudet<sup>4</sup>,  
Yun Zhu<sup>5</sup>, Xiaochun Wang<sup>1,2</sup>, Jiewen Shen<sup>1,2</sup>, Shengyue Li<sup>1,2</sup>, Yicong  
He<sup>1,2</sup>, Dejie Yin<sup>1,2</sup>, Zhaoxin Dong<sup>1,2</sup>

<sup>1</sup>State Key Joint Laboratory of Environment Simulation and Pollution  
Control, School of Environment, Tsinghua University, 100084 Beijing,  
China

<sup>2</sup>State Environmental Protection Key Laboratory of Sources and Control  
of Air Pollution Complex, Beijing, 100084, China

<sup>3</sup>Department of Earth, Atmospheric, and Planetary Sciences, Purdue  
University, West Lafayette, IN, USA,

<sup>4</sup>Pacific Northwest National Laboratory, Richland, Washington, USA

<sup>5</sup>Guangdong Provincial Key Laboratory of Atmospheric Environment and  
Pollution Control, College of Environment and Energy, South China  
University of Technology, Guangzhou Higher Education Mega Center,

23 Guangzhou, 510006, China

24 \*Correspondence to: Bin Zhao (bzhao@mail.tsinghua.edu.cn)

25

26 Table S1. Statistics for the simulation of meteorological factors in January  
27 and July of 2013 and 2021.

| Meteorological factors |              | OBS    | SIM    | Bias  |
|------------------------|--------------|--------|--------|-------|
| T2 (°C)                | January 2013 | 269.23 | 269.10 | -0.76 |
|                        | January 2021 | 270.56 | 269.97 | -0.59 |
|                        | July 2013    | 298.02 | 297.16 | -0.86 |
|                        | July 2021    | 298.55 | 297.65 | -0.90 |
| Q2 (g/kg)              | January 2013 | 2.47   | 2.38   | -0.09 |
|                        | January 2021 | 2.54   | 2.46   | -0.09 |
|                        | July 2013    | 14.86  | 14.71  | -0.15 |
|                        | July 2021    | 16.30  | 15.58  | -0.72 |
| WS10 (m/s)             | January 2013 | 2.38   | 3.31   | 0.94  |
|                        | January 2021 | 2.68   | 3.68   | 1.00  |
|                        | July 2013    | 2.62   | 3.62   | 1.00  |
|                        | July 2021    | 2.69   | 3.51   | 0.82  |
| WD10 (°)               | January 2013 | 275.99 | 282.83 | 10.27 |
|                        | January 2021 | 259.21 | 251.70 | 11.46 |
|                        | July 2013    | 192.27 | 183.08 | 4.86  |
|                        | July 2021    | 180.47 | 157.43 | 3.96  |

28

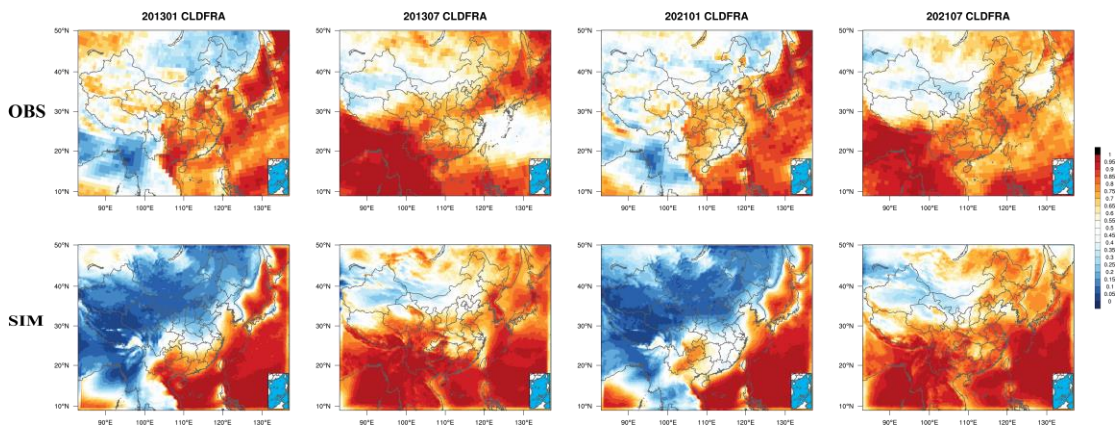

29

30 Fig. S1. Observation and simulation of cloud fraction in January and July  
31 of 2013 and 2021.

32

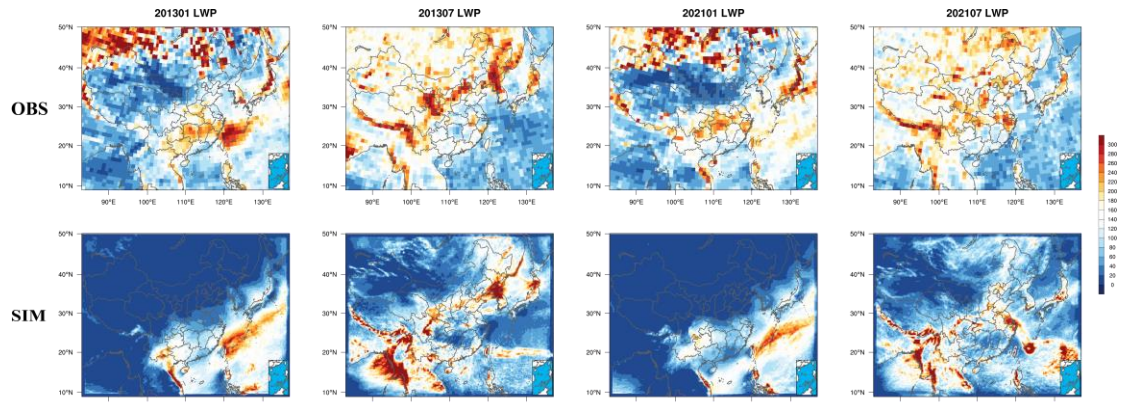

Fig. S2. Observation and simulation of liquid water path (unit:  $\text{g m}^{-2}$ ) in January and July of 2013 and 2021.

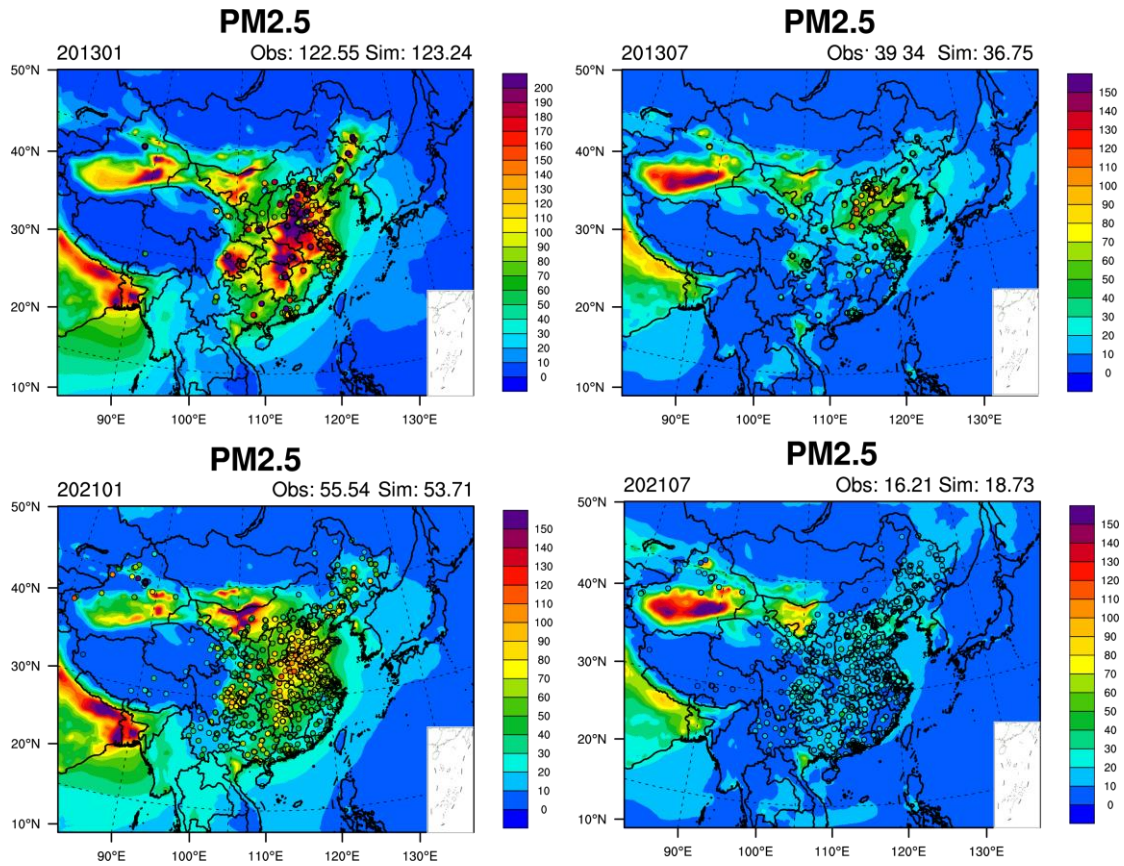

Fig. S3. Observation and simulation of surface  $\text{PM}_{2.5}$  concentration (unit:  $\mu\text{g m}^{-3}$ ) in January and July of 2013 and 2021.

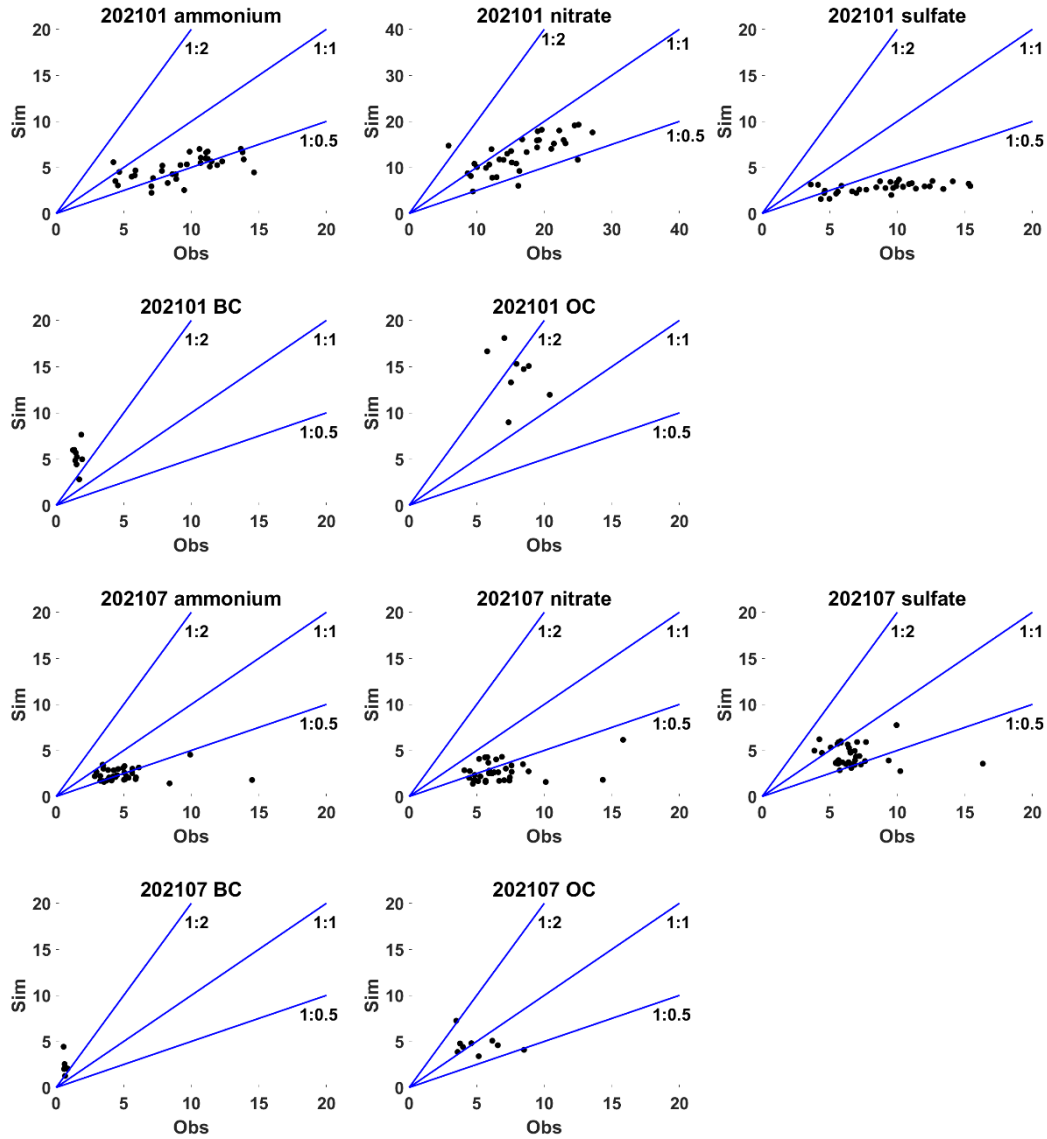

Fig. S4. The ratios of simulation to observation of ammonium, nitrate, sulfate, black carbon (BC), and organic carbon (OC) (unit:  $\mu\text{g m}^{-3}$ ) in January and July 2021.

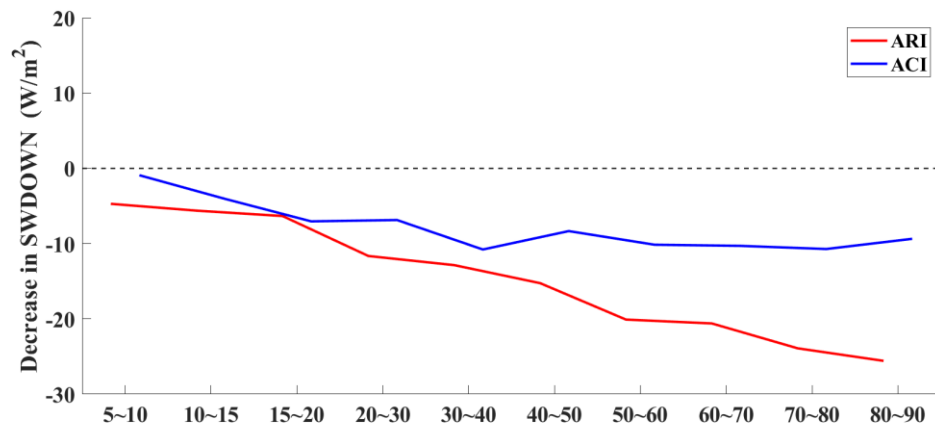

49

50 Fig. S5. The SWDOWN reduction induced by ARI and ACI under different  
 51 ambient  $PM_{2.5}$  levels.
